# Supplementary material
Source: PubMed Central journal article supplement (PMC3958136)

## Supplementary Information

### Assessment of Quantum Mechanical Methods for Copper Complexes by Photoelectron Spectroscopy

Shuqiang Niu,<sup>1</sup> Dao-Ling Huang,<sup>2</sup> Phuong D. Dau,<sup>2</sup> Hong-Tao Liu,<sup>2</sup> Lai-Sheng  
Wang,<sup>2</sup> and Toshiko Ichiye<sup>1,3\*</sup>

<sup>1</sup> Department of Chemistry, Georgetown University, Washington, DC 20057

<sup>2</sup> Department of Chemistry, Brown University, Providence, RI 02912

\*Corresponding author. Tel: 202-687-3724; Fax: 202-687-6209; Email: [ti9@georgetown.edu](mailto:ti9@georgetown.edu)

**Table S1.** The Optimized and Experimental Bond lengths (r in Å) of  $[\text{Cu}(\text{NCS})_2]^{1-}$  and  $[\text{Cu}(\text{NCS})_2]^0$ .

|                           | B3LYP             |                  |                  |                   |                  |                  |
|---------------------------|-------------------|------------------|------------------|-------------------|------------------|------------------|
|                           | [1-]              |                  |                  | [0]               |                  |                  |
|                           | $r_{\text{Cu-N}}$ | $r_{\text{N-C}}$ | $r_{\text{C-S}}$ | $r_{\text{Cu-N}}$ | $r_{\text{N-C}}$ | $r_{\text{C-S}}$ |
| DZVP2                     | 1.827             | 1.187            | 1.634            | 1.800             | 1.191            | 1.612            |
| Def2-SVP                  | 1.828             | 1.183            | 1.628            | 1.803             | 1.187            | 1.608            |
| 6-31G**                   | 1.765             | 1.184            | 1.632            | 1.748             | 1.193            | 1.600            |
| 6-31(++ <sub>L</sub> )G** | 1.779             | 1.185            | 1.632            | 1.759             | 1.195            | 1.599            |
| Def2-SVPD                 | 1.828             | 1.180            | 1.635            | 1.801             | 1.185            | 1.612            |
| Def2-TZVPPD               | 1.830             | 1.174            | 1.623            | 1.800             | 1.179            | 1.599            |
| aug-cc-pVTZ               | 1.832             | 1.174            | 1.628            | 1.801             | 1.179            | 1.604            |
|                           |                   |                  |                  | M06               |                  |                  |
| DZVP2                     | 1.816             | 1.185            | 1.626            | 1.792             | 1.190            | 1.603            |
| Def2-SVP                  | 1.817             | 1.183            | 1.621            | 1.790             | 1.188            | 1.601            |
| 6-31G**                   | 1.759             | 1.183            | 1.626            | 1.744             | 1.193            | 1.593            |
| 6-31(++ <sub>L</sub> )G** | 1.768             | 1.183            | 1.626            | 1.751             | 1.193            | 1.592            |
| ma-SVP                    | 1.816             | 1.180            | 1.629            | 1.789             | 1.186            | 1.604            |
| Def2-SVPD                 | 1.818             | 1.180            | 1.628            | 1.790             | 1.186            | 1.605            |
| Def2-TZVPPD               | 1.816             | 1.171            | 1.619            | 1.786             | 1.177            | 1.594            |
| aug-cc-pVTZ               | 1.818             | 1.171            | 1.623            | 1.788             | 1.177            | 1.599            |
| exp. <sup>a</sup>         | 1.808             | 1.137            | 1.639            |                   |                  |                  |

<sup>a</sup> Ref. 59

**Table S2.** The Optimized and Experimental Bond Lengths ( $r$  in Å), Angles ( $\theta$  in °), and Dihedral Angles ( $\phi$  in °) of  $[\text{Cu}(\text{SCH}_3)_2]^{1-}$  and  $[\text{Cu}(\text{SCH}_3)_2]^0$ .

|                           | B3LYP             |                  |                          |                          |                         |                   |                  |                          |                          |                         |
|---------------------------|-------------------|------------------|--------------------------|--------------------------|-------------------------|-------------------|------------------|--------------------------|--------------------------|-------------------------|
|                           | [1-]              |                  |                          |                          |                         | [0]               |                  |                          |                          |                         |
|                           | $r_{\text{Cu-S}}$ | $r_{\text{S-C}}$ | $\theta_{\text{S-Cu-S}}$ | $\theta_{\text{Cu-S-C}}$ | $\phi_{\text{C-S-S-C}}$ | $r_{\text{Cu-S}}$ | $r_{\text{S-C}}$ | $\theta_{\text{S-Cu-S}}$ | $\theta_{\text{Cu-S-C}}$ | $\phi_{\text{C-S-S-C}}$ |
| DZVP2                     | 2.196             | 1.852            | 180.0                    | 103.7                    | 90.7                    | 2.136             | 1.841            | 180.0                    | 105.1                    | 180.0                   |
| Def2-SVP                  | 2.201             | 1.841            | 179.9                    | 102.7                    | 90.9                    | 2.145             | 1.834            | 179.6                    | 104.6                    | 178.5                   |
| 6-31G**                   | 2.119             | 1.848            | 179.6                    | 106.5                    | 90.3                    | 2.087             | 1.844            | 179.7                    | 106.3                    | 180.0                   |
| 6-31(++ <sub>L</sub> )G** | 2.121             | 1.854            | 155.9                    | 99.2                     | –                       | 2.085             | 1.844            | 179.5                    | 106.2                    | 180.0                   |
| Def2-SVPD                 | 2.206             | 1.847            | 180.0                    | 103.3                    | 95.6                    | 2.152             | 1.835            | 179.5                    | 104.8                    | 178.4                   |
| Def2-TZVPPD               | 2.195             | 1.841            | 178.9                    | 106.2                    | 89.7                    | 2.136             | 1.829            | 179.9                    | 106.5                    | 180.0                   |
| aug-cc-pVTZ               | 2.195             | 1.845            | 178.8                    | 105.2                    | 89.8                    | 2.136             | 1.834            | 180.0                    | 106.5                    | 179.6                   |
|                           |                   |                  |                          |                          |                         | M06               |                  |                          |                          |                         |
| DZVP2                     | 2.174             | 1.840            | 178.9                    | 101.2                    | 92.9                    | 2.116             | 1.829            | 180.0                    | 102.4                    | 180.0                   |
| Def2-SVP                  | 2.180             | 1.829            | 177.9                    | 101.1                    | 96.2                    | 2.126             | 1.824            | 179.9                    | 103.7                    | 180.0                   |
| 6-31G**                   | 2.097             | 1.838            | 178.7                    | 102.5                    | 88.6                    | 2.068             | 1.834            | 172.5                    | 99.7                     | 179.7                   |
| 6-31(++ <sub>L</sub> )G** | 2.112             | 1.845            | 152.7                    | 85.5                     | –                       | 2.067             | 1.834            | 169.3                    | 99.5                     | 180.0                   |
| Def2-SVPD                 | 2.187             | 1.834            | 178.8                    | 100.9                    | 99.5                    | 2.132             | 1.823            | 180.0                    | 103.4                    | 180.0                   |
| Def2-TZVPPD               | 2.178             | 1.829            | 178.7                    | 102.1                    | 81.3                    | 2.119             | 1.817            | 179.9                    | 104.2                    | 180.0                   |
| aug-cc-pVTZ               | 2.176             | 1.835            | 179.7                    | 102.8                    | 84.6                    | 2.118             | 1.824            | 180.0                    | 104.2                    | 180.0                   |
| exp. <sup>a</sup>         | 2.140             | 1.847            | 176.7                    | 106.1                    | 78.7                    |                   |                  |                          |                          |                         |
|                           | 2.143             | 1.841            | 179.6                    | 107.8                    | 120.7                   |                   |                  |                          |                          |                         |

<sup>a</sup> Ref. 58

**Table S3.** The Calculated and Experimental ADE and VDE (eV)<sup>a</sup> of [Cu(SMe)<sub>2</sub>]<sup>1-</sup> and [Cu(NCS)<sub>2</sub>]<sup>1-</sup>.

|                                   | [Cu(NCS) <sub>2</sub> ] <sup>1-</sup> |         | [Cu(SMe) <sub>2</sub> ] <sup>1-</sup> |         |
|-----------------------------------|---------------------------------------|---------|---------------------------------------|---------|
|                                   | ADE                                   | VDE     | ADE                                   | VDE     |
| B3LYP/DZVP2                       | 4.331                                 | 4.357   | 2.627                                 | 2.986   |
| B3LYP/Def2-SVP                    | 3.893                                 | 3.915   | 2.198                                 | 2.556   |
| B3LYP/6-31G**                     | 3.721                                 | 3.768   | 1.899                                 | 2.292   |
| B3LYP/6-31(++) <sub>L</sub> G**   | 3.910                                 | 3.963   | 2.071                                 | 2.434   |
| B3LYP/Def2-SVPD                   | 4.328                                 | 4.357   | 2.756                                 | 3.070   |
| B3LYP/Def2-TZVPPD                 | 4.300                                 | 4.333   | 2.730                                 | 3.094   |
| B3LYP/aug-cc-pVTZ                 | 4.310                                 | 4.341   | 2.729                                 | 3.089   |
| M06/DZVP2                         | 4.434                                 | 4.461   | 2.790                                 | 3.152   |
| M06/Def2-SVP                      | 4.106                                 | 4.132   | 2.346                                 | 2.677   |
| M06/6-31G**                       | 3.822                                 | 3.873   | 2.070                                 | 2.503   |
| M06/6-31(++) <sub>L</sub> G**     | 3.963                                 | 4.018   | 2.345                                 | 2.826   |
| M06/Def2-SVPD                     | 4.530                                 | 4.524   | 2.832                                 | 3.121   |
| M06/Def2-TZVPPD                   | 4.406                                 | 4.439   | 2.867                                 | 3.286   |
| M06/aug-cc-pVTZ                   | 4.447                                 | 4.479   | 2.888                                 | 3.291   |
| CCSD/Def2-SVPD//M06/Def2-SVP      | 4.939                                 | 4.931   | 3.128                                 | 3.437   |
| CCSDDef2-SVPD//M06/DZVP2          | 4.942                                 | 4.939   | 3.121                                 | 3.438   |
| CCSD/Def2-TZVPPD//M06/Def2-SVP    | 5.063                                 | 5.081   | 3.188                                 | 3.370   |
| CCSD/Def2-TZVPPD//M06/DZVP2       | 5.064                                 | 5.088   | 3.139                                 |         |
| CCSD(T)/Def2-SVPD//M06/Def2-SVP   | 4.750                                 | 4.747   | 3.028                                 | 3.156   |
| CCSD(T)/Def2-SVPD//M06/DZVP2      | 4.752                                 | 4.754   | 3.037                                 | 3.353   |
| CCSD(T)/Def2-TZVPPD//M06/Def2-SVP | 4.855                                 | 4.890   | 3.073                                 | 3.255   |
| CCSD(T)/Def2-TZVPPD//M06/DZVP2    | 4.856                                 | 4.897   | 3.037                                 |         |
| exp.                              | 4.86(5)                               | 4.92(5) | ~3.2                                  | 3.43(7) |

<sup>a</sup> The calculated ADE and VDE do not take the zero point vibrational energy into account.<sup>b</sup> at 20 K

**TABLE S4. T1 AND T2**

|                         | $[\text{Cu}(\text{SCH}_3)_2]^{1-}$ | $[\text{Cu}(\text{NCS})_2]^{1-}$ | $\text{FeCl}_4^-$ | $[\text{Fe}(\text{SCH}_3)_4]^{1-}$ |
|-------------------------|------------------------------------|----------------------------------|-------------------|------------------------------------|
| T1 (reduced)            | 0.021                              | 0.023                            | 0.028             | 0.032                              |
| T1 (vertical oxidized)  | 0.039                              | 0.040                            | 0.052             | 0.044                              |
| T1 (adiabatic oxidized) | 0.028                              | 0.037                            | 0.053             | 0.048                              |
| T2 (reduced)            | 0.044                              | 0.067                            | 0.108             | 0.146                              |
| T2 (vertical oxidized)  | 0.286                              | 0.251                            | 0.160             | 0.206                              |
| T2 (adiabatic oxidized) | 0.164                              | 0.228                            | 0.185             | 0.210                              |

**Figure S1.** Calculated VDE from the difference in energy between the reduced form and a Franck-Condon transition (black) and from the HOMO energy (blue) for  $[\text{Cu}(\text{NCS})_2]^{1-}$  (triangle),  $[\text{Cu}(\text{SCH}_3)_2]^{1-}$  (square),  $\text{FeCl}_4^-$  (circle), and  $[\text{Fe}(\text{SCH}_3)_4]^{1-}$  (diamond), using the DZVP2 basis set for RS functionals in order of increasing (short-range) HF exchange. From left to right, the RS functionals (solid symbols) are BNL, CAM-B3LYP, and LRC- $\omega$ PBEh and the highly optimized RS functionals (lighter colored symbols) are  $\omega$ B97,  $\omega$ B97X, and M11. The symbols are connected by dotted lines to guide the eye and the results for the Fe complexes are shifted upwards by 3 eV to avoid overlaps. The experimental PES values (gray line with error indicated approximately by width of line) are also shown.

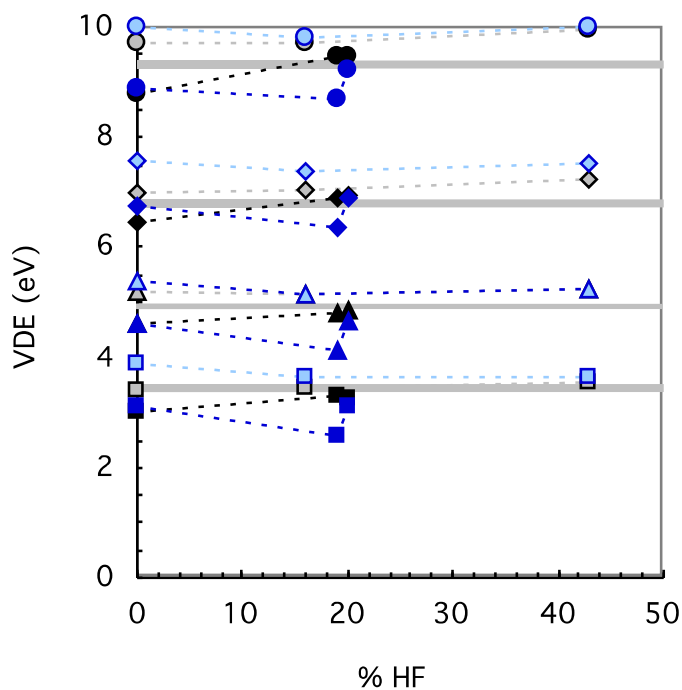

Supplement: ct400842p_si_001.pdf [file ct400842p_si_001.pdf]
